# Supplementary material for: Drug discovery for male subfertility using high-throughput screening: a new approach to an unsolved problem
Source: PubMed Central journal article supplement (PMC5850465; doi:10.1093/humrep/dex055), 2017-03-16
Supplement: dex055_supplementaryfigures1.pdf [file dex055_supplementaryfigures1.pdf]

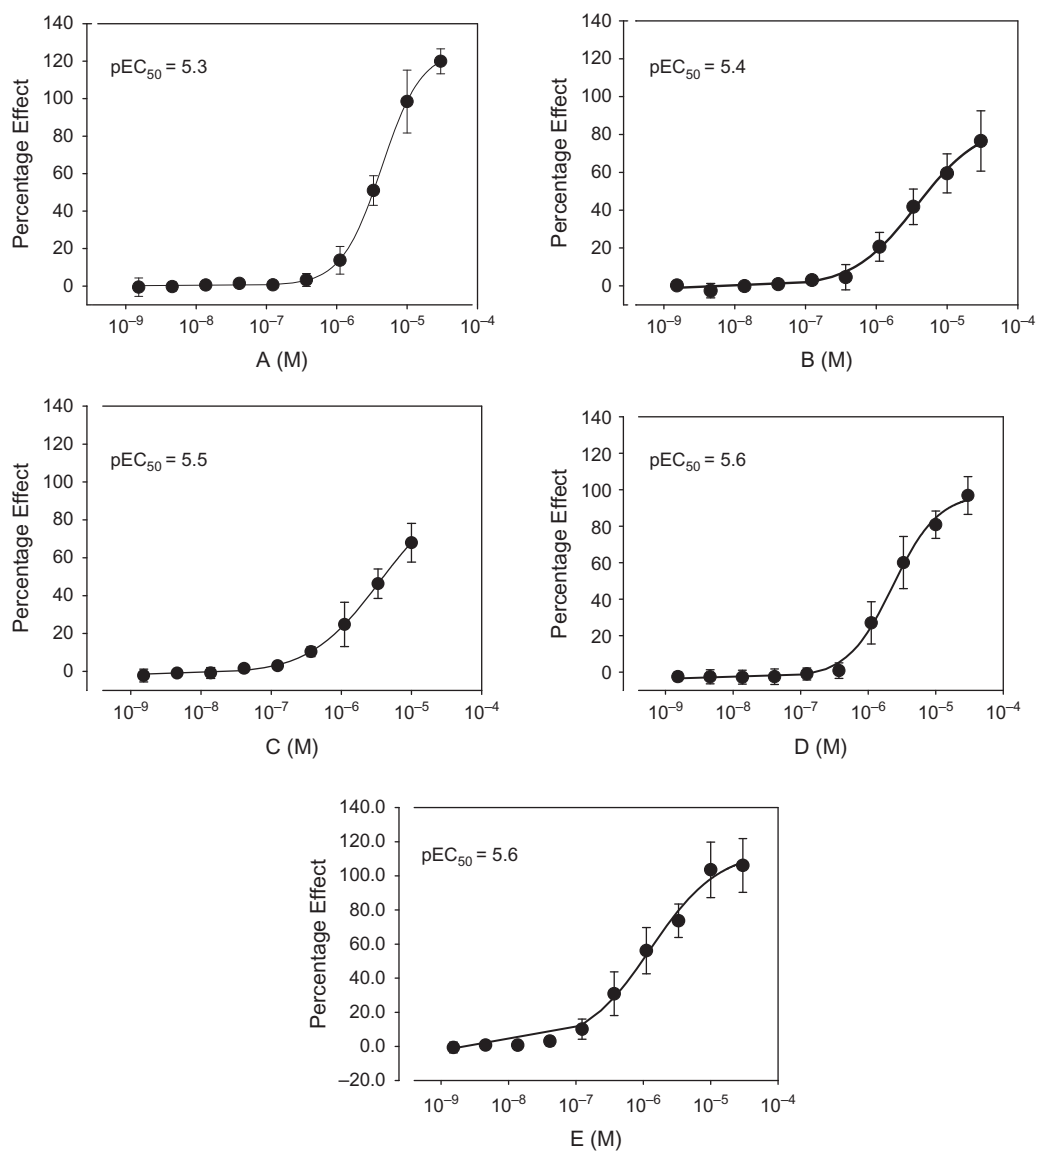

**Supplementary Figure S1** Dose effect curves. Best five agonist compounds following ion channel library screening: DDD00104789, DDD00104960, DDD00105020, DDD00105498 and DDD00106181, subsequently coded A–E.
