# Supplementary material for: Drug discovery for male subfertility using high-throughput screening: a new approach to an unsolved problem
Source: PubMed Central journal article supplement (PMC5850465; doi:10.1093/humrep/dex055), 2017-03-16
Supplement: dex055_supplementaryfigures2.pdf [file dex055_supplementaryfigures2.pdf]

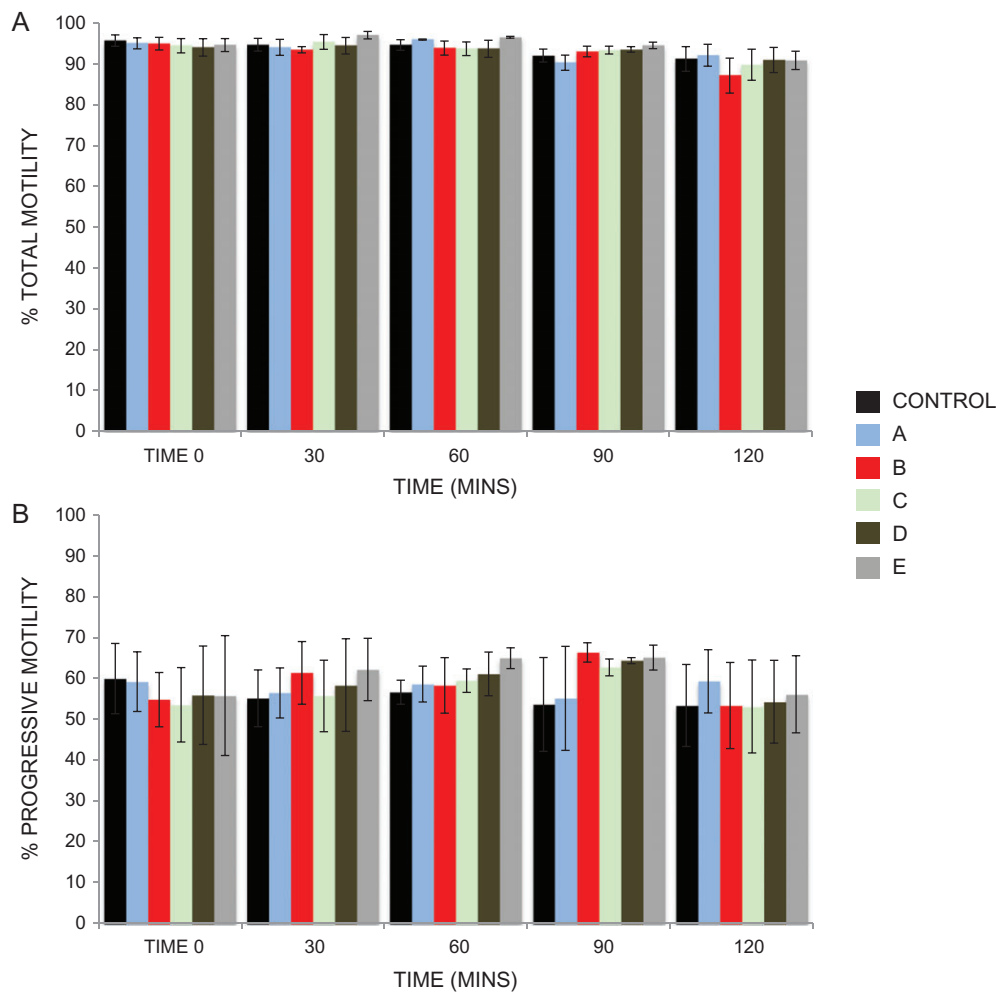

**Supplementary Figure S2** CASA kinematic data in sperm following preparation by DGC. No significant difference in % total motility (**A**) or % progressive motility (**B**) seen with 10  $\mu$ M compound A–E compared with control over time: time 0 (T0) to 120 min. No significant difference in average path velocity (VAP; **C**), curvilinear velocity (VCL; **D**), straight-line velocity (VSL; **E**) or lateral head displacement (ALH; **F**) following incubation with 10  $\mu$ M compound A over time: time 0–120 min. No significant difference in VAP (**G**), VCL (**H**), VSL (**I**) or ALH (**J**) following incubation with 10  $\mu$ M compound B over time: time 0–120 min. CASA, computer-assisted sperm assessment; DGC, density gradient centrifugation.

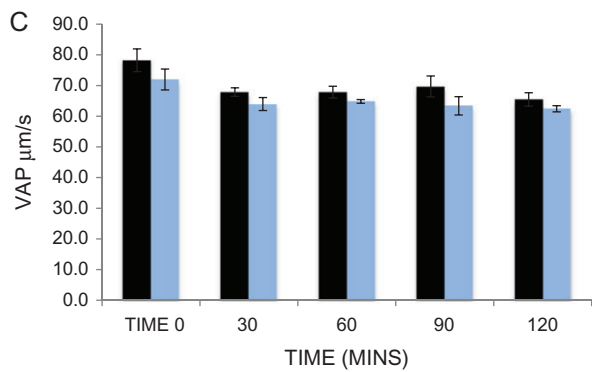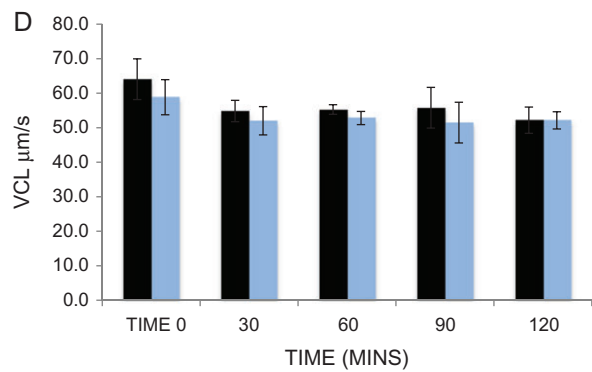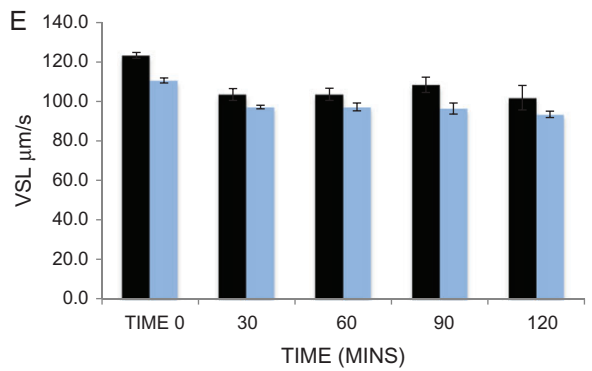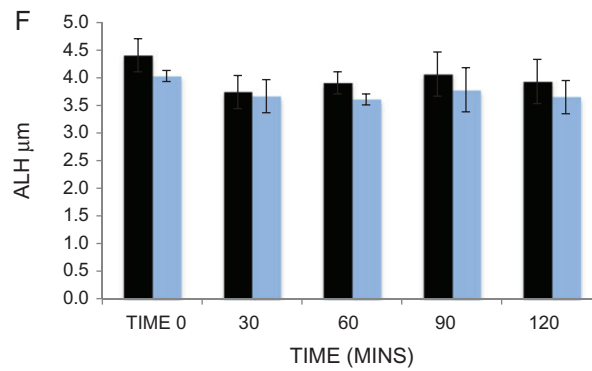

■ CONTROL ■ A

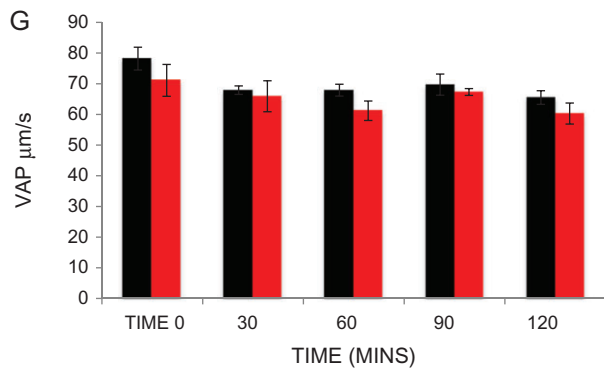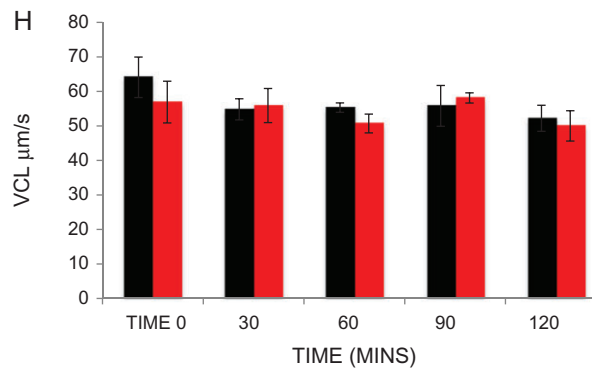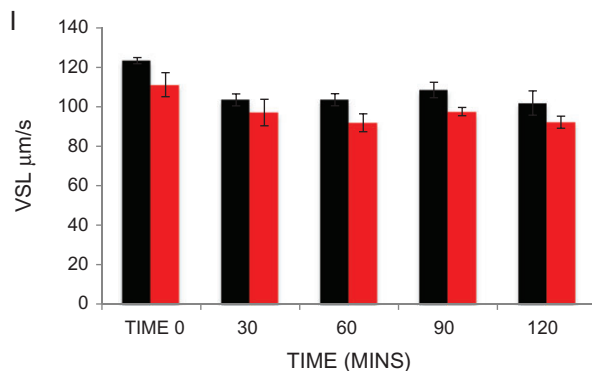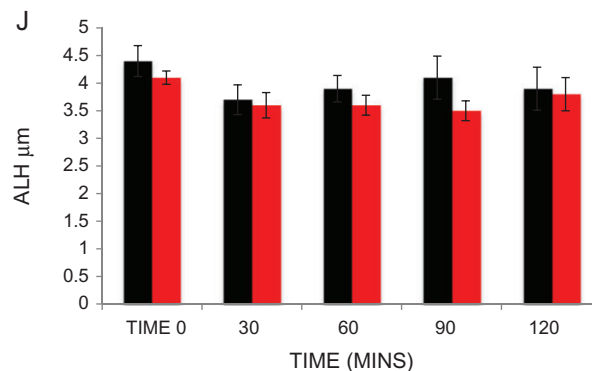

■ CONTROL ■ B
