# Supplementary material for: Drug discovery for male subfertility using high-throughput screening: a new approach to an unsolved problem
Source: PubMed Central journal article supplement (PMC5850465; doi:10.1093/humrep/dex055), 2017-03-16
Supplement: dex055_supplementaryfigures3.pdf [file dex055_supplementaryfigures3.pdf]

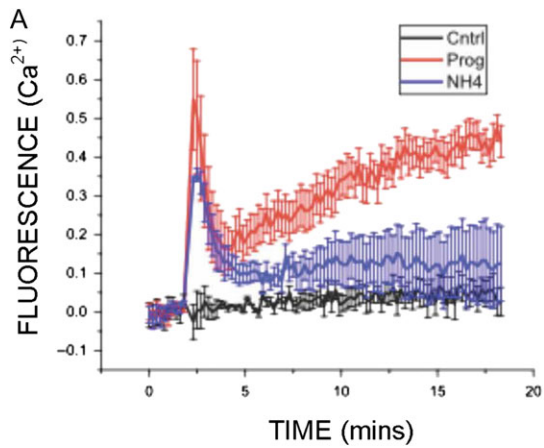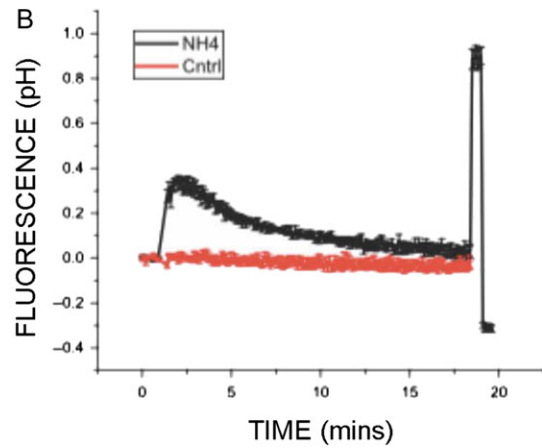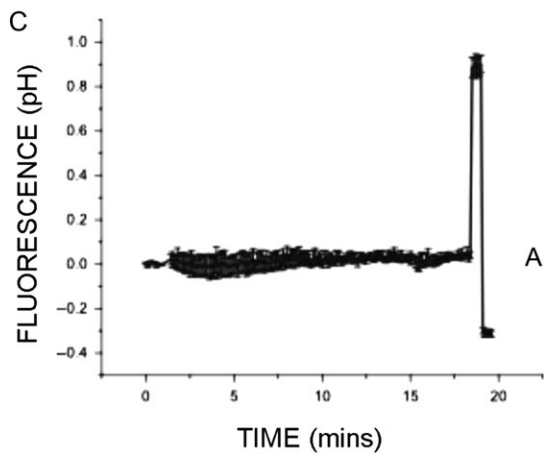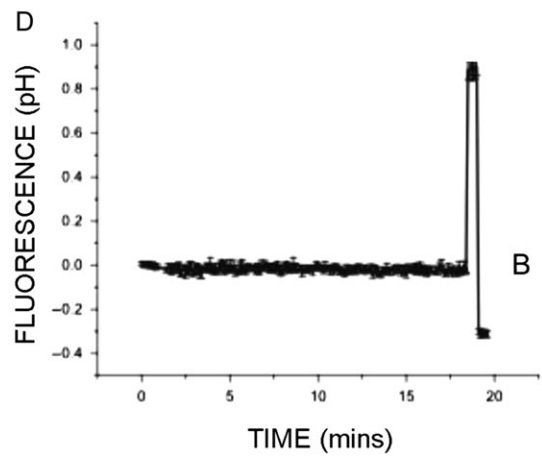

**Supplementary Figure S3** FLUOstar data. FURA2 was used to measure intracellular  $\text{Ca}^{2+}$ . BCECF (2',7'-bis(2-carboxyethyl)-5,6-carboxy-fluorescein) was used to track changes in intracellular pH. **(A)** Expected calcium response following addition of 3.6  $\mu\text{M}$  progesterone (red),  $\text{NH}_4$  (blue) or control (black). **(B)** pH change following addition of  $\text{NH}_4$  (black) and control (red). No effect on pH was observed following addition of compound A **(C)** or B **(D)**.
