# Supplementary material for: Drug discovery for male subfertility using high-throughput screening: a new approach to an unsolved problem
Source: PubMed Central journal article supplement (PMC5850465; doi:10.1093/humrep/dex055), 2017-03-16
Supplement: dex055_supplementarytablesi.pdf [file dex055_supplementarytablesi.pdf]

**Supplementary Table S1** Diagnostic semen analysis parameters for patients (n = 17) undertaking fertility treatment (IVF/ICSI).

| Research ID | Diagnostic semen analysis |              |                          |                  | After DGC    |                          |
|-------------|---------------------------|--------------|--------------------------|------------------|--------------|--------------------------|
|             | Volume (ml)               | Conc. (M/ml) | Progressive motility (%) | Normal forms (%) | Conc. (M/ml) | Progressive motility (%) |
| R1333       | 3.7                       | 38.0         | 49                       | 3.0              | 10.3         | 98.5                     |
| R1346       | 7.0                       | 16.9         | 72                       | 7.5              | 6.0          | 95                       |
| R1347       | 4.7                       | 3.7          | 32                       | 1.4              | 0.73         | 15                       |
| R1348       | 1.0                       | 80.0         | 55                       | 8.0              | 29.0         | 95                       |
| R1357       | 3.2                       | 60.0         | 59                       | 4.0              | 16.3         | 95                       |
| R1364       | 1.5                       | 35.0         | 74                       | 14.0             | 7.0          | 95                       |
| R1371       | 2.4                       | 65.8         | 56                       | 5.0              | 3.7          | 85                       |
| R1384       | 4.8                       | 86.5         | 28                       | 2.8              | 5.7          | 90                       |
| R1385       | 0.9                       | 34.3         | 44.8                     | 3.7              | 9.0          | 95                       |
| R2580       | 1.6                       | 188.0        | 48.0                     | 8.0              | 2.9          | 95                       |
| R2581       | 2.6                       | 15.0         | 36.0                     | 0.3              | 2.5          | 90                       |
| R2614       | 3.8                       | 46.0         | 54.0                     | 3.0              | 3.0          | 93                       |
| R2615       | 1.6                       | 51.0         | 85.0                     | 9.0              | 27.1         | 90                       |
| R2622       | 2.0                       | 65.1         | 43.0                     | 11.0             | 19.0         | 92                       |
| R2623       | 4.0                       | 15.0         | 64.0                     | 2.0              | 6.0          | 95                       |
| R2632       | 2.8                       | 89.0         | 60.0                     | 3.0              | 6.85         | 98                       |
| R2634       | 6.0                       | 31.6         | 47.0                     | 5.0              | 1.0          | 90                       |

Samples surplus to clinical requirements were donated for research on the day of treatment at Ninewells Assisted Conception Unit. Sperm concentration and progressive motility following standard preparation by density gradient centrifugation (DGC) are also shown. All patients underwent IVF, except R1347 (ICSI).
